# Supplementary material for: A Bayesian active learning strategy for sequential experimental design in systems biology
Source: PubMed Central journal article supplement (PMC4181721; doi:10.1186/s12918-014-0102-6), 2014-09-26
Supplement: 12918_2014_102_MOESM2_ESM.pdf [file 12918_2014_102_MOESM2_ESM.pdf]

# Annex A: DREAM7 network description

## 1 Kinetics

The complete network description and implementations of integrators to simulate its dynamics are available from DREAM7 challenge website. The dynamical equations governing the evolution of time concentration are as follows, where the names of the different variables are represented in Figure 2.

$$\begin{aligned}
 [\text{as1}] &= \frac{\left(\frac{[\text{p1}]}{r_{1\text{Kd}}}\right)^{r_{1\text{h}}}}{1 + \left(\frac{[\text{p1}]}{r_{1\text{Kd}}}\right)^{r_{1\text{h}}}} & [\text{as9}] &= \frac{\left(\frac{[\text{p6}]}{r_{11\text{Kd}}}\right)^{r_{11\text{h}}}}{1 + \left(\frac{[\text{p6}]}{r_{11\text{Kd}}}\right)^{r_{11\text{h}}}} \\
 [\text{as2}] &= \frac{\left(\frac{[\text{p1}]}{r_{2\text{Kd}}}\right)^{r_{2\text{h}}}}{1 + \left(\frac{[\text{p1}]}{r_{2\text{Kd}}}\right)^{r_{2\text{h}}}} & [\text{rs1a}] &= \frac{1}{1 + \left(\frac{[\text{p2}]}{r_{4\text{Kd}}}\right)^{r_{4\text{h}}}} \\
 [\text{as3}] &= \frac{\left(\frac{[\text{p4}]}{r_{5\text{Kd}}}\right)^{r_{5\text{h}}}}{1 + \left(\frac{[\text{p4}]}{r_{5\text{Kd}}}\right)^{r_{5\text{h}}}} & [\text{rs1b}] &= \frac{1}{1 + \left(\frac{[\text{p6}]}{r_{8\text{Kd}}}\right)^{r_{8\text{h}}}} \\
 [\text{as5}] &= \frac{\left(\frac{[\text{p8}]}{r_{13\text{Kd}}}\right)^{r_{13\text{h}}}}{1 + \left(\frac{[\text{p8}]}{r_{13\text{Kd}}}\right)^{r_{13\text{h}}}} & [\text{rs2}] &= \frac{1}{1 + \left(\frac{[\text{p3}]}{r_{3\text{Kd}}}\right)^{r_{3\text{h}}}} \\
 [\text{as6}] &= \frac{\left(\frac{[\text{p9}]}{r_{9\text{Kd}}}\right)^{r_{9\text{h}}}}{1 + \left(\frac{[\text{p9}]}{r_{9\text{Kd}}}\right)^{r_{9\text{h}}}} & [\text{rs3}] &= \frac{1}{1 + \left(\frac{[\text{p5}]}{r_{7\text{Kd}}}\right)^{r_{7\text{h}}}} \\
 [\text{as7}] &= \frac{\left(\frac{[\text{p6}]}{r_{12\text{Kd}}}\right)^{r_{12\text{h}}}}{1 + \left(\frac{[\text{p6}]}{r_{12\text{Kd}}}\right)^{r_{12\text{h}}}} & [\text{rs7}] &= \frac{1}{1 + \left(\frac{[\text{p7}]}{r_{6\text{Kd}}}\right)^{r_{6\text{h}}}} \\
 & & [\text{rs8}] &= \frac{1}{1 + \left(\frac{[\text{p9}]}{r_{10\text{Kd}}}\right)^{r_{10\text{h}}}}
 \end{aligned}$$

$$\begin{aligned}
 [\text{g1}] &= [\text{as1}] \cdot [\text{rs1a}] \cdot [\text{rs1b}] \\
 [\text{g2}] &= [\text{as2}] \cdot [\text{rs2}] \\
 [\text{g3}] &= [\text{as3}] \cdot [\text{rs3}] \\
 [\text{g4}] &= [\text{as4}] \cdot [\text{rs4}] \\
 [\text{g5}] &= [\text{as5}] \\
 [\text{g6}] &= 1 \\
 [\text{g7}] &= [\text{as7}] \cdot [\text{rs7}] \\
 [\text{g8}] &= [\text{rs8}] \\
 [\text{g9}] &= [\text{as9}]
 \end{aligned}$$

$$\begin{aligned}
\frac{d([p1])}{dt} &= \text{rbs1strength} \cdot [v1\text{mrna}] - p1\text{degradationRate} \cdot [p1] \\
\frac{d([p2])}{dt} &= \text{rbs2strength} \cdot [v2\text{mrna}] - p2\text{degradationRate} \cdot [p2] \\
\frac{d([p3])}{dt} &= \text{rbs3strength} \cdot [v3\text{mrna}] - p3\text{degradationRate} \cdot [p3] \\
\frac{d([p4])}{dt} &= \text{rbs4strength} \cdot [v4\text{mrna}] - p4\text{degradationRate} \cdot [p4] \\
\frac{d([p5])}{dt} &= \text{rbs5strength} \cdot [v5\text{mrna}] - p5\text{degradationRate} \cdot [p5] \\
\frac{d([p6])}{dt} &= \text{rbs6strength} \cdot [v6\text{mrna}] - p6\text{degradationRate} \cdot [p6] \\
\frac{d([p7])}{dt} &= \text{rbs8strength} \cdot [v7\text{mrna}] - p7\text{degradationRate} \cdot [p7] \\
\frac{d([p8])}{dt} &= \text{rbs7strength} \cdot [v8\text{mrna}] - p8\text{degradationRate} \cdot [p8] \\
\frac{d([p9])}{dt} &= \text{rbs9strength} \cdot [v9\text{mrna}] - p9\text{degradationRate} \cdot [p9] \\
\frac{d([v1\text{mrna}])}{dt} &= \text{pro1strength} \cdot [g1] - v1\text{mrnaDegradationRate} \cdot [v1\text{mrna}] \\
\frac{d([v2\text{mrna}])}{dt} &= \text{pro2strength} \cdot [g2] - v2\text{mrnaDegradationRate} \cdot [v2\text{mrna}] \\
\frac{d([v3\text{mrna}])}{dt} &= \text{pro3strength} \cdot [g3] - v3\text{mrnaDegradationRate} \cdot [v3\text{mrna}] \\
\frac{d([v4\text{mrna}])}{dt} &= \text{pro4strength} \cdot [g4] - v4\text{mrnaDegradationRate} \cdot [v4\text{mrna}] \\
\frac{d([v5\text{mrna}])}{dt} &= \text{pro5strength} \cdot [g5] - v5\text{mrnaDegradationRate} \cdot [v5\text{mrna}] \\
\frac{d([v6\text{mrna}])}{dt} &= \text{pro6strength} \cdot [g6] - v6\text{mrnaDegradationRate} \cdot [v6\text{mrna}] \\
\frac{d([v7\text{mrna}])}{dt} &= \text{pro7strength} \cdot [g9] - v7\text{mrnaDegradationRate} \cdot [v7\text{mrna}] \\
\frac{d([v8\text{mrna}])}{dt} &= \text{pro9strength} \cdot [g7] - v8\text{mrnaDegradationRate} \cdot [v8\text{mrna}] \\
\frac{d([v9\text{mrna}])}{dt} &= \text{pro8strength} \cdot [g8] - v9\text{mrnaDegradationRate} \cdot [v9\text{mrna}]
\end{aligned}$$

With kinetic variables

$$\begin{aligned}
&[p1], [p2], [p3], [p4], [p5], [p6], [p7], [p8], [p9] \\
&[v1\text{mrna}], [v2\text{mrna}], [v3\text{mrna}], [v4\text{mrna}], [v5\text{mrna}], [v6\text{mrna}], [v7\text{mrna}], [v8\text{mrna}], [v9\text{mrna}],
\end{aligned}$$

And kinetic parameters

|                                   |                                 |                                   |
|-----------------------------------|---------------------------------|-----------------------------------|
| $v1_{\text{mrnaDegradationRate}}$ | $p8_{\text{degradationRate}}$   | $\text{rbs}7_{\text{strength}}$   |
| $v2_{\text{mrnaDegradationRate}}$ | $\text{pro}1_{\text{strength}}$ | $\text{rbs}8_{\text{strength}}$   |
| $v7_{\text{mrnaDegradationRate}}$ | $\text{pro}2_{\text{strength}}$ | $\text{rbs}9_{\text{strength}}$   |
| $v6_{\text{mrnaDegradationRate}}$ | $\text{pro}3_{\text{strength}}$ | $r1_{\text{Kd}}, r1_{\text{h}}$   |
| $v5_{\text{mrnaDegradationRate}}$ | $\text{pro}4_{\text{strength}}$ | $r2_{\text{Kd}}, r2_{\text{h}}$   |
| $v6_{\text{mrnaDegradationRate}}$ | $\text{pro}5_{\text{strength}}$ | $r3_{\text{Kd}}, r3_{\text{h}}$   |
| $v7_{\text{mrnaDegradationRate}}$ | $\text{pro}6_{\text{strength}}$ | $r4_{\text{Kd}}, r4_{\text{h}}$   |
| $v8_{\text{mrnaDegradationRate}}$ | $\text{pro}7_{\text{strength}}$ | $r5_{\text{Kd}}, r5_{\text{h}}$   |
| $v9_{\text{mrnaDegradationRate}}$ | $\text{pro}8_{\text{strength}}$ | $r6_{\text{Kd}}, r6_{\text{h}}$   |
| $p1_{\text{degradationRate}}$     | $\text{pro}9_{\text{strength}}$ | $r7_{\text{Kd}}, r6_{\text{h}}$   |
| $p2_{\text{degradationRate}}$     | $\text{rbs}1_{\text{strength}}$ | $r8_{\text{Kd}}, r7_{\text{h}}$   |
| $p3_{\text{degradationRate}}$     | $\text{rbs}2_{\text{strength}}$ | $r9_{\text{Kd}}, r9_{\text{h}}$   |
| $p4_{\text{degradationRate}}$     | $\text{rbs}3_{\text{strength}}$ | $r10_{\text{Kd}}, r10_{\text{h}}$ |
| $p5_{\text{degradationRate}}$     | $\text{rbs}4_{\text{strength}}$ | $r11_{\text{Kd}}, r11_{\text{h}}$ |
| $p6_{\text{degradationRate}}$     | $\text{rbs}5_{\text{strength}}$ | $r12_{\text{Kd}}, r12_{\text{h}}$ |
| $p7_{\text{degradationRate}}$     | $\text{rbs}6_{\text{strength}}$ | $r13_{\text{Kd}}, r13_{\text{h}}$ |
| $p9_{\text{degradationRate}}$     |                                 |                                   |

Among them, we suppose that we have

$$\begin{aligned}
&v1_{\text{mrnaDegradationRate}} = v2_{\text{mrnaDegradationRate}} = v3_{\text{mrnaDegradationRate}} \\
&= v4_{\text{mrnaDegradationRate}} = v5_{\text{mrnaDegradationRate}} = v6_{\text{mrnaDegradationRate}} \\
&= v7_{\text{mrnaDegradationRate}} = v8_{\text{mrnaDegradationRate}} = v9_{\text{mrnaDegradationRate}} \\
&= 1,
\end{aligned}$$

and

$$\begin{aligned}
&p1_{\text{degradationRate}} = p2_{\text{degradationRate}} = p3_{\text{degradationRate}} \\
&= p4_{\text{degradationRate}} = p5_{\text{degradationRate}} = p6_{\text{degradationRate}} \\
&= p7_{\text{degradationRate}} = p8_{\text{degradationRate}} = p9_{\text{degradationRate}}.
\end{aligned}$$

This makes a total of 45 parameters governing the behaviour of 18 kinetic variables.

## 2 Description of the experimental cost and challenge experimental plan

| <b>Perturbation</b>                                     | <b>Cost</b> | <b>Concentration to observe</b>    | <b>Cost</b> |
|---------------------------------------------------------|-------------|------------------------------------|-------------|
| Wildtype<br>(no perturbation)                           | 0           | Two proteins<br>(Resolution: 0.5s) | 300         |
| Gene knockdown<br>(mrna degradation rate $\times 10$ )  | 350         | All mrna<br>(Resolution: 4s)       | 500         |
| Decrease ribosomal activity<br>(ribosomal strength /10) | 450         | All mrna<br>(Resolution: 2s)       | 1000        |
| Delete gene<br>(mrna and protein concentration = 0)     | 800         |                                    |             |

Table S1: Description of the cost. Each participant begins with a 10000 initial credit budget. The cost of each experiment was the sum of the costs of the corresponding molecular perturbation and quantity to observe. Molecular perturbations could be performed on any of the genes.

| <b>Perturbation</b>                | <b>Observation</b>                            |
|------------------------------------|-----------------------------------------------|
| Wildtype                           | mrna low resolution (free)                    |
| Wildtype                           | pairwise protein time course for all proteins |
| Delete gene 7                      | Protein 3 and 8                               |
| Decrease ribosomal strength gene 9 | All mrna at high resolution                   |
| Knockdown gene 7                   | Protein 8 and 9                               |
| Knockdown gene 6                   | Protein 3 and 8                               |
| Knockdown gene 4                   | Protein 3 and 7                               |
| Decrease ribowomal strength gene 6 | All mrna at high resolution                   |
| Delete gene 9                      | Protein 2 and 3                               |

Table S2: Successive experiments performed during the challenge.

| <b>Perturbation</b>              | <b>Observation</b>       |
|----------------------------------|--------------------------|
| Divide $r9_{Kd}$ by 10           | Proteins 3, 5 and 8      |
| Multiply $rbs3_{strength}$ by 2  | 0.5s time resolution     |
| Multiply $rbs3_{strength}$ by 10 | from $t = 0$ to $t = 20$ |

Table S3: Unseen experiment.
